# Supplementary material for: Flower-like bimetal Ni/Co-based metal–organic-framework materials with adjustable components toward high performance solid-state supercapacitors
Source: Royal Society of Chemistry journal article supplement (doi:10.1039/d1qm00940k), 2021-01-01
Supplement: d1qm00940k1.pdf [file d1qm00940k1.pdf]

## Supporting Information

### Flower-like bimetal Ni/Co based metal-organic-framework materials with adjustable components toward high performance solid-state supercapacitors

Fuyong Ren<sup>a</sup>, Yajun Ji<sup>\*a</sup>, Fei Chen<sup>a</sup>, Yiyi Qian<sup>a</sup>, Jingjing Tian<sup>a</sup>, Juncen Wang<sup>a</sup>

<sup>a</sup>University of Shanghai for Science and Technology, Jungong Road 334#, 200093 Shanghai, China. \*Corresponding author: E-mail: [jiyajun@usst.edu.cn](mailto:jiyajun@usst.edu.cn)

Fax: +86 21 65667144; Tel: +86 21 65667144

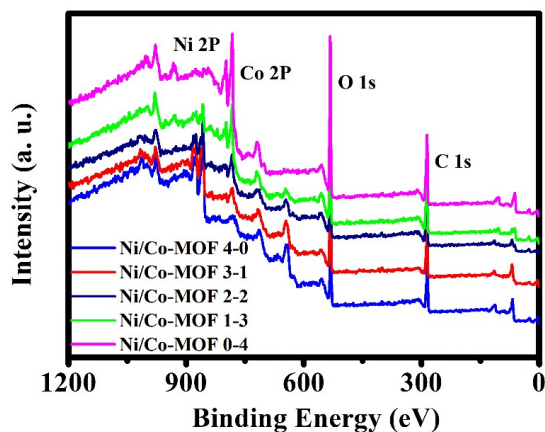

Fig. S1 XPS spectrum of all obtained Ni/Co-MOF.

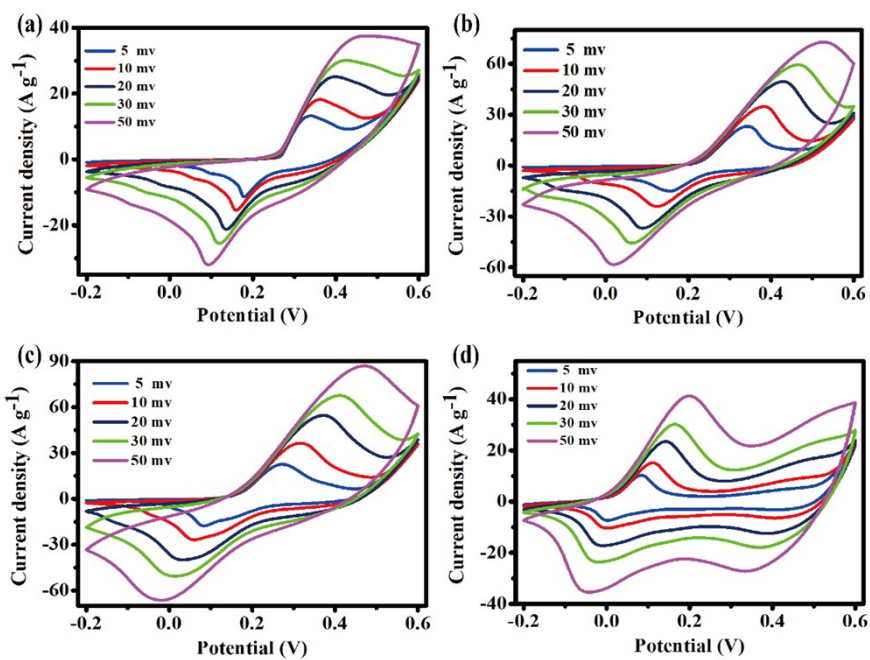

Fig. S2 The CV curves of (a) Ni/Co-MOF 4-0, (b) Ni/Co-MOF 3-1, (c) Ni/Co-MOF 2-2 and (d) Ni/Co-MOF 0-4.

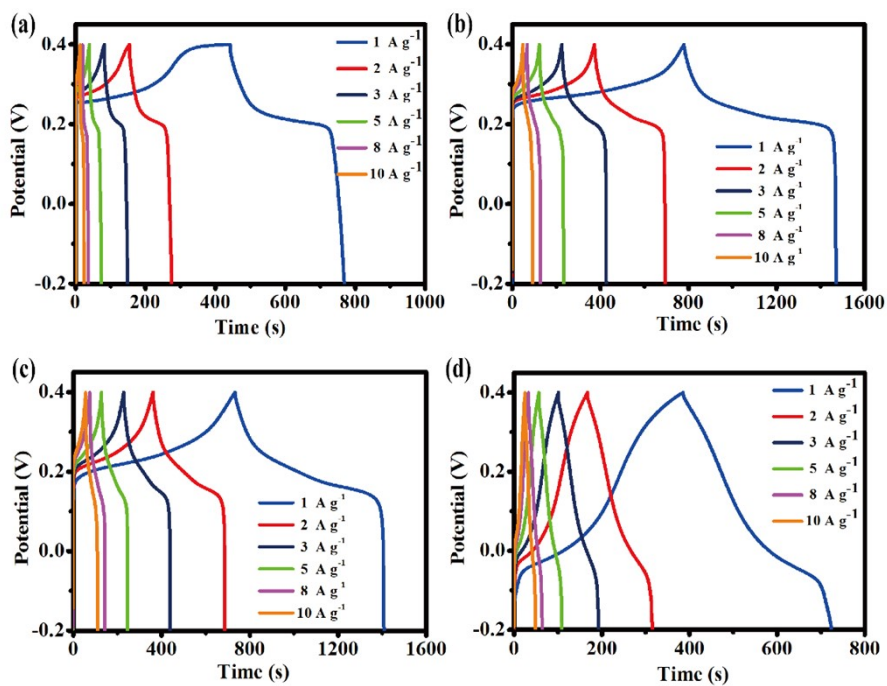

Fig. S3 The GCD curves of (a) Ni/Co-MOF 4-0, (b) Ni/Co-MOF 3-1, (c) Ni/Co-MOF 2-2 and (d) Ni/Co-MOF 0-4.

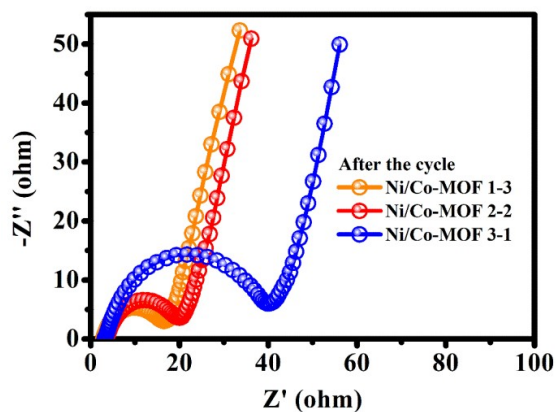

Fig. S4 The Nyquist plots of Ni/Co-MOF 3-1, Ni/Co-MOF 2-2 and Ni/Co-MOF 1-3 electrodes after 4000 cycles.

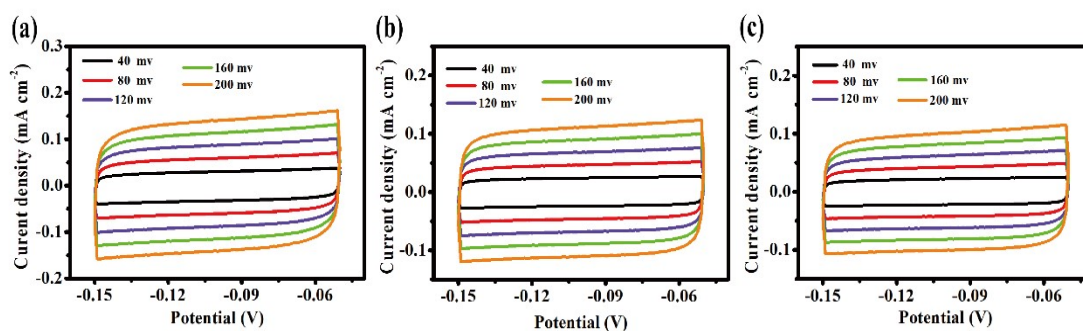

Fig. S5 The CV curves of (a) Ni/Co-MOF 1-3, (b) Ni/Co-MOF 2-2 and (c) Ni/Co-MOF 3-1 electrodes between -0.15 V to -0.05 V with different scanning rates.

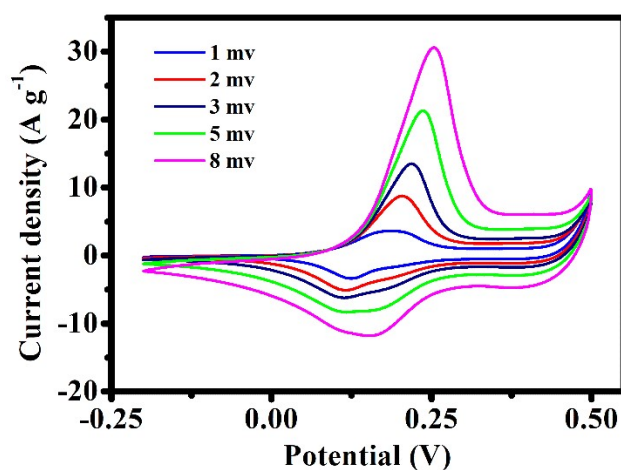

Fig. S6 The CV curves of Ni/Co-MOF 1-3 at the scan rate range from 1  $\text{mV s}^{-1}$  to 8  $\text{mV s}^{-1}$ .

Table S1 The detailed compositions and contents of all obtained electrode materials.

| Materials     | Ni (%) | Co (%) | C (%) | O (%) |
|---------------|--------|--------|-------|-------|
| Ni/Co-MOF 4-0 | 13.99  | 0      | 49.08 | 36.94 |
| Ni/Co-MOF 3-1 | 14.21  | 4.10   | 42.74 | 38.95 |
| Ni/Co-MOF 2-2 | 7.10   | 6.05   | 52.01 | 34.83 |
| Ni/Co-MOF 1-3 | 3.67   | 9.06   | 52.66 | 34.61 |
| Ni/Co-MOF 0-4 | 1.28*  | 14.47  | 45.04 | 39.21 |

\*: Nickel element comes from Ni foam

Table S2 The specific capacitance of all electrode materials.

| Materials     | Specific capacities (F g <sup>-1</sup> ) |                     |                     |                     |                     |                      | Rate performance (%) |
|---------------|------------------------------------------|---------------------|---------------------|---------------------|---------------------|----------------------|----------------------|
|               | 1 A g <sup>-1</sup>                      | 2 A g <sup>-1</sup> | 3 A g <sup>-1</sup> | 5 A g <sup>-1</sup> | 8 A g <sup>-1</sup> | 10 A g <sup>-1</sup> |                      |
| Ni/Co-MOF 4-0 | 544.5                                    | 401.7               | 334.5               | 281.7               | 224.0               | 193.3                | 35.5                 |
| Ni/Co-MOF 3-1 | 1150.3                                   | 168.7               | 1007.5              | 913.3               | 806.7               | 746.7                | 64.9                 |
| Ni/Co-MOF 2-2 | 1124.8                                   | 1085.3              | 1051.0              | 992.5               | 928.0               | 870.0                | 77.7                 |
| Ni/Co-MOF 1-3 | 1230.3                                   | 1199.3              | 1175.0              | 1138.3              | 1093.3              | 1070.0               | 87.0                 |
| Ni/Co-MOF 0-4 | 563.8                                    | 493.0               | 458.0               | 433.3               | 406.7               | 390.0                | 69.2                 |

Table S3 The EIS data of all electrode materials after fitting.

| Resistance type                                  | Ni/Co-MOF 4-0 | Ni/Co-MOF 3-1 | Ni/Co-MOF 2-2 | Ni/Co-MOF 1-3 | Ni/Co-MOF 0-4 |
|--------------------------------------------------|---------------|---------------|---------------|---------------|---------------|
| Series resistance (R <sub>s</sub> , Ω)           | 2.828         | 2.733         | 1.928         | 1.342         | 2.289         |
| Charge transfer resistance (R <sub>ct</sub> , Ω) | 3.858         | 1.594         | 0.917         | 0.501         | 1.525         |

Table S4 The electrochemical performance of some other reported devices.

| Electrode materials                                                   | Energy density<br>(Wh kg <sup>-1</sup> ) | Power density<br>(W kg <sup>-1</sup> ) | Stability (Cycles)  | Reference       |
|-----------------------------------------------------------------------|------------------------------------------|----------------------------------------|---------------------|-----------------|
| CoNi@SNC//AC                                                          | 55.7                                     | 0.8                                    | 90.6% (4000)        | [1]             |
| Co-Ni <sub>3</sub> S <sub>2</sub> //AC                                | 59.1                                     | 1.276                                  | 94.9% (16000)       | [2]             |
| (Ni, Co)Se <sub>2</sub> @rGO//AC                                      | 52.6                                     | 0.803                                  | 100% (10000)        | [3]             |
| Ni-Co/CP/PBI-KOH//AC                                                  | 75.1                                     | 0.9                                    | 85.5% (8000)        | [4]             |
| Co-HKUST//AC                                                          | 71.35                                    | 0.81                                   | 91.8% (5000)        | [5]             |
| Co <sub>3</sub> O <sub>4</sub> @CoNi <sub>2</sub> S <sub>4</sub> //AC | 55.6                                     | 0.884                                  | 86% (10000)         | [6]             |
| Ni/C/rGO-4//AC                                                        | 79.7                                     | 1.275                                  | 83.7% (8000)        | [7]             |
| Ni/C/rGO-7//AC                                                        | 91.8                                     | 0.8                                    | 90.3% (8000)        | [8]             |
| <b>Ni/Co-MOF 1-3//AC</b>                                              | <b>116</b>                               | <b>0.795</b>                           | <b>92.1% (6000)</b> | <b>Our work</b> |

Reference:

1. M. Tong, S. Liu, X. Zhang, T. Wu, H. Zhang, G. Wang, Y. Zhang, X. Zhu and H. Zhao, Two-dimensional CoNi nanoparticles@S,N-doped carbon composites derived from S,N-containing Co/Ni MOFs for high performance supercapacitors, *J. Mater. Chem. A*, 2017, **5**, 9873-9881.
2. P. Zhou, Y. Wu, C. Wang, H. Huang, D. Xing, Y. Liu, Z. Wang, P. Wang, Z. Zheng, H. Cheng, Y. Dai and B. Huang, Tailoring the composition and structure of Ni<sub>3</sub>S<sub>2</sub> by introduction of Co towards high efficiency energy storage device, *Chem. Eng. J.*, 2021, **403**, 126285.
3. X. Liu, S. Ding, L. Ye, Y. Du, L. Zhao and Y. Zhu, Optimizing the supercapacitive performance via encasing MOF-derived hollow (Ni,Co)Se<sub>2</sub> nanocubes into reduced graphene oxide, *Chem. Eng. J.*, 2020, **399**, 125789.
4. L. Chen, D. Ou, G. Zhang, J. Yan, J. Liu, Z. Wang, Y. Wang, J. Cui, Q. Zhang, Y. Zhang, X. Hu and Y. Wu, Ni-Co coordination hollow spheres for high performance flexible all-solid-state supercapacitor, *Electrochim. Acta*, 2020, **337**, 135828.
5. X. Sun, X. Liu, J. Wang, X. Jiang, R. Liu, A. Li and W. Li, Nanobundles structural Co-HKUST on the foamed nickel with a high supercapacitor performance, *SN Appl. Sci.*, 2020, **2**, 414.
6. D. Han, J. Wei, Y. Zhao, Y. Shen, Y. Pan, Y. Wei and L. Mao, Metal-organic framework derived petal-like Co<sub>3</sub>O<sub>4</sub>@CoNi<sub>2</sub>S<sub>4</sub> hybrid on carbon cloth with enhanced performance for supercapacitors, *Inorg. Chem. Front.*, 2020, **7**, 1428-1436.
7. X. Shi, J. Yu, Q. Liu, L. Shao, Y. Zhang, Z. Sun and H. Huang, Metal-organic-framework-derived N-, P-, and O-codoped nickel/carbon composites homogeneously decorated on reduced graphene oxide

for energy storage, *ACS Appl. Nano Mater.*, 2020, **3**, 5625-5636.

8. N. Xin, Y. Liu, H. Niu, H. Bai and W. Shi, In-situ construction of metal organic frameworks derived Co/Zn-S sandwiched graphene film as free-standing electrodes for ultra-high energy density supercapacitors, *J. Power Sources*, 2020, **451**, 227772.
